# Supplementary material for: Effective marker alleles associated with type 2 resistance to Fusarium head blight infection in fields
Source: PubMed Central journal article supplement — Breed Sci. 2016 May 16;66(3):350–7. doi: 10.1270/jsbbs.15124 (PMC4902456; doi:10.1270/jsbbs.15124), 2016-05-16
Supplement: 66_15124_1.pdf [file 66_15124_1.pdf]

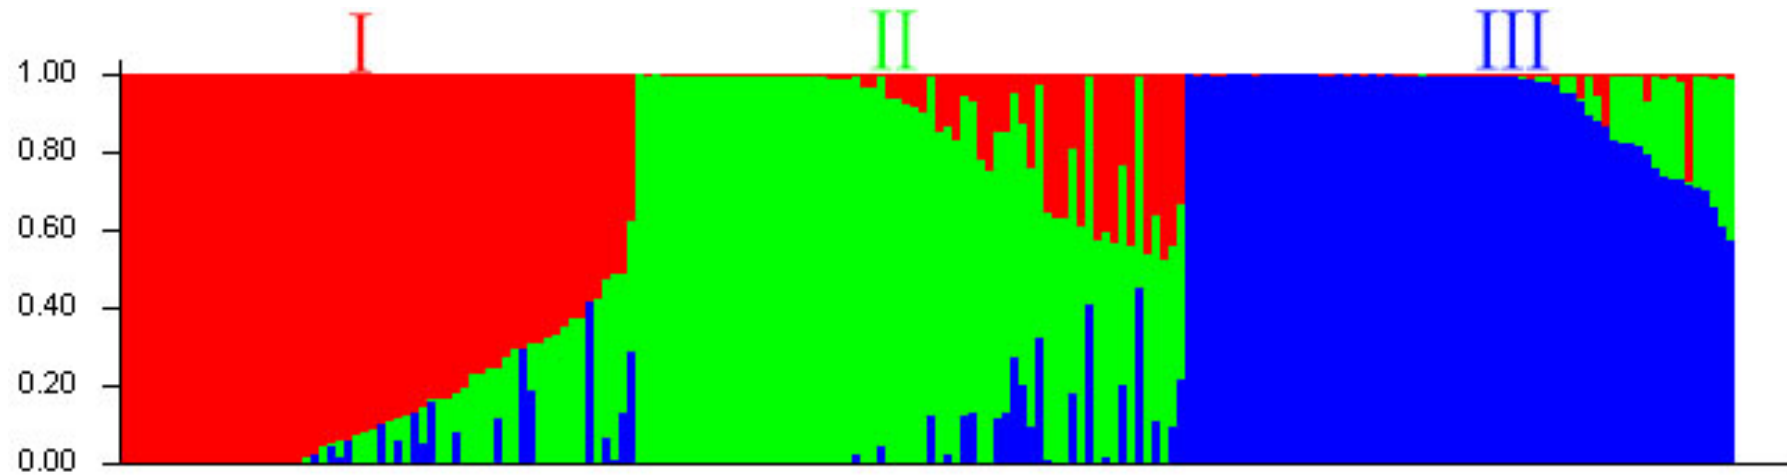

**Supplemental Fig. 1.** Population structure inferred by Bayesian clustering approaches based on simple sequence repeat (SSR) using STRUCTURE (K=3).
