# Supplementary material for: Effective marker alleles associated with type 2 resistance to Fusarium head blight infection in fields
Source: PubMed Central journal article supplement — Breed Sci. 2016 May 16;66(3):350–7. doi: 10.1270/jsbbs.15124 (PMC4902456; doi:10.1270/jsbbs.15124), 2016-05-16
Supplement: 66_15124_2.pdf [file 66_15124_2.pdf]

**Supplemental Table 1. Genetic diversity of the three subgroups**

| Group | No. of varieties | No. of alleles | Average No. of alleles per locus | Genetic diversity | PIC  |
|-------|------------------|----------------|----------------------------------|-------------------|------|
| G1    | 62               | 1720           | 4.6                              | 0.44              | 0.41 |
| G2    | 66               | 2543           | 6.9                              | 0.6               | 0.56 |
| G3    | 66               | 2151           | 5.8                              | 0.49              | 0.46 |
| Total | 194              | 6414           | 17.3                             | 1.54              | 1.43 |

**Supplemental Table 2. Percentage of symptomatic spikelets of the accession in G1**

| ACC.           | PSS  | Origin | Pedigree                                              |
|----------------|------|--------|-------------------------------------------------------|
| JG 1           | 9.6  | China  | Unknown pedigree                                      |
| Ning7840       | 11.8 | China  | Aurora/Anhui 11//Sumai 3                              |
| Fu5114         | 13.4 | China  | LongXi 18/(Aurora/Anhui11//Sumai 3)                   |
| F60096         | 18.9 | China  | Jingzhou 1/Sumai 2                                    |
| Su49           | 21.5 | China  | N7922/(Aurora/Anhui 11//Sumai 3)                      |
| Sumai3         | 21.5 | China  | Funo/Taiwanxiaomai                                    |
| Sumai2         | 22.3 | China  | Funo relative                                         |
| Suyang7-2      | 22.8 | China  | Funo relative                                         |
| ND2419         | 24.9 | China  | Selection of Mentana                                  |
| QIAOMAIXIAOMA  | 25.8 | China  | Landrace                                              |
| Xiangmai12     | 27.4 | China  | Mexico120/Dali63//Wanya3                              |
| Zhen 7495      | 27.6 | China  | Unknown pedigree                                      |
| Sumai1         | 28.2 | China  | Funo relative                                         |
| F5125          | 28.3 | China  | Unknown pedigree                                      |
| Fumai3         | 29.4 | China  | Orofen/Funo                                           |
| Emai6          | 29.6 | China  | Selection from radiated Nanda 2419                    |
| Qunzhong10     | 36.8 | China  | Funo relative                                         |
| Youyimai       | 36.8 | China  | Unknown pedigree                                      |
| Xiangmai10     | 37.7 | China  | Funo relative                                         |
| Wumai1         | 38.7 | China  | Funo relative                                         |
| Wannian 2      | 39.0 | China  | Selection of Mentana                                  |
| Hubei 48130    | 40.7 | China  | Unknown pedigree                                      |
| Ai73           | 41.1 | China  | Funo relative                                         |
| Fumai3-1       | 44.0 | China  | Orofen/Funo                                           |
| Dsuma i3       | 44.1 | China  | Damuzhiai/Sumai 3*22 (carrying Rht3)                  |
| Ning 8319      | 45.1 | China  | Unknown pedigree                                      |
| Huai69-6       | 46.0 | China  | Funo relative                                         |
| Zhongshan11    | 46.1 | China  | Funo relative                                         |
| Jingguangmai   | 47.2 | China  | Funo relative                                         |
| Huamai7        | 50.2 | China  | Funo relative                                         |
| Jiangdu 1      | 51.1 | China  | Funo relative                                         |
| Ninjing 6935-8 | 52.0 | China  | Unknown pedigree                                      |
| Yixi4          | 52.0 | China  | Funo relative                                         |
| Yangmai1       | 52.8 | China  | Selection from Funo                                   |
| Yangmai5       | 56.2 | China  | 916//ST1472/506                                       |
| Yunmai35       | 58.9 | China  | Funo relative                                         |
| Wanya2         | 59.4 | China  | Funo relative                                         |
| Xiangmai11     | 59.8 | China  | Funo relative                                         |
| Maoyingafu2    | 60.0 | China  | Funo relative                                         |
| Yangmai2       | 61.9 | China  | Unknown pedigree                                      |
| Xiangmai8      | 63.2 | China  | Funo relative                                         |
| Qianjiang1     | 65.1 | China  | Funo relative                                         |
| Yunmai25       | 65.9 | China  | Selected from Yunmai5                                 |
| Zhemai6        | 67.0 | China  | Funo relative                                         |
| Linnong12      | 67.4 | China  | Funo relative                                         |
| Xuan7          | 67.7 | China  | Funo relative                                         |
| Yunmai27       | 72.8 | China  | Unknown pedigree                                      |
| Fengmai2       | 76.1 | China  | Fengxiang//Funo//Yumai4                               |
| Jingzhou 1     | 76.7 | China  | Unknown pedigree                                      |
| Yangmai3       | 77.6 | China  | Selection from Yangmai 1                              |
| Yangmai4       | 78.0 | China  | Funo relative                                         |
| Xiannong68     | 78.4 | China  | Selected from Xiannong4                               |
| Luohan 2       | 82.0 | China  | 78(111)Ai/Jinmai33                                    |
| Zhenmai17      | 87.4 | China  | Funo relative                                         |
| Linnong14      | 89.1 | China  | Funo relative                                         |
| Mengfeng8      | 89.8 | China  | Mengfeng7*Neimeng64                                   |
| Huimaoafu      | 93.3 | China  | Funo relative                                         |
| Sanshukomugi   | 31.9 | Japan  | Landrace                                              |
| Funo           | 70.0 | Italy  | Duecentodieci/Demiano                                 |
| Frontana       | 71.8 | Brazil | Fronteira (=Polysu / Alfredo Chaves 6 - 21) / Mentana |

**Supplemental Table 3. Percentage of symptomatic spikelets of the accessions in G2**

| ACC.                  | PSS  | Origin        | Pedigree                                                               |
|-----------------------|------|---------------|------------------------------------------------------------------------|
| TaFangShen            | 27.0 | China         | Landrace                                                               |
| HeimangDongMai        | 27.3 | China         | Landrace                                                               |
| PC-2                  | 28.2 | China         | Unknown pedigree                                                       |
| Par-55                | 30.7 | China         | Unknown pedigree                                                       |
| Xiangnong3            | 31.6 | China         | Funo relative                                                          |
| Taiwan wheat          | 32.9 | China         | Landrace                                                               |
| JG 2                  | 37.0 | China         | Unknown pedigree                                                       |
| Tawanhsiaomai         | 50.4 | China         | Landrace                                                               |
| Siyang117             | 50.6 | China         | Funo relative                                                          |
| JiangDongMen          | 52.5 | China         | Landrace                                                               |
| XingHuaBaiYuHua       | 56.3 | China         | Landrace                                                               |
| JG 3                  | 56.4 | China         | Unknown pedigree                                                       |
| Wan7107               | 62.6 | China         | Selected from Nanyang                                                  |
| Mutangchiang          | 63.0 | China         | Landrace                                                               |
| Zhongliang11          | 66.4 | China         | Funo relative                                                          |
| Sanchahoh             | 69.8 | China         | Landrace                                                               |
| Fusuihuang            | 73.1 | China         | Landrace                                                               |
| Beiquan565            | 75.4 | China         | Unknown pedigree                                                       |
| Zhenghan 1            | 77.1 | China         | Selected from Nuohan                                                   |
| Hua 512               | 84.3 | China         | Selected from Huamai5                                                  |
| Wenmai 6              | 85.2 | China         | Selected from Yumai49                                                  |
| Jinmai 33             | 87.3 | China         | 79391/7626                                                             |
| ND2928                | 13.9 | USA           | Ning 7840/ND706                                                        |
| Roane                 | 19.3 | USA           | VA71-54-147(CI17449)/C68-15//IN65309C1-18-2-3-2 (formerly VA93-54-429) |
| Endurance             | 23.1 | USA           | HBV756A/ Siouxland//2180                                               |
| Ernie                 | 25.6 | USA           | Pike/3/Stoddard/Blueboy//Stoddard/D1707                                |
| Freedom               | 32.4 | USA           | GR876/OH217                                                            |
| Bess                  | 36.8 | USA           | MO11769/Madison (formerly MO981020)                                    |
| Atlas66               | 43.9 | USA           | Frondoso // Redhart 3 / Noll 28                                        |
| Jerry                 | 46.6 | USA           | Roughrider//Winoka/NB66425/3/Arapahoe                                  |
| Branson               | 49.3 | USA           | Pio2737W/891-4584A (Pike/FL302) (formerly M00-3701)                    |
| Fuller                | 50.3 | USA           | Unknown, Jagger related                                                |
| Century               | 51.4 | USA           | Payne//TAM W-101/Amigo                                                 |
| Wesley                | 54.9 | USA           | Plainsman V / Odesskaya 51 // Colt / Cody                              |
| Centerfield           | 56.9 | USA           | (TXGH12588-105*4/FS4)/2*2174                                           |
| Clark                 | 62.5 | USA           | Beau//65256A1-8-1/67137B5-16/Sullivan/Beau//5517B8-5-3-3/Logan         |
| Antelope              | 66.7 | USA           | Pronghorn/Arlin                                                        |
| TAM110                | 68.2 | USA           | (TAM 105*4/Amigo)*5//Largo                                             |
| chisholm              | 70.0 | USA           | Sturdy sib/Nicoma                                                      |
| Scout66               | 73.0 | USA           | composite of 85 selections from Scout                                  |
| TAM107                | 73.3 | USA           | TAM105*4/Amigo                                                         |
| Deliver               | 77.2 | USA           | Yantar/2*Chisholm//Karl                                                |
| Overley               | 78.5 | USA           | TAM-107 *3/ TA 2460/ Heyne 'S'// Jagger                                |
| Trego                 | 81.6 | USA           | KS87H325/Rio Blanco                                                    |
| T158                  | 84.6 | USA           | KS93U206/ 2*T81                                                        |
| Duster                | 91.5 | USA           | W0405D/NE78488//W7469C/TX81V6187                                       |
| Wheaton               | 91.9 | USA           | Crim(CI13465)/2*(CI13986)Era//Buitre/Gallo                             |
| Guymon                | 94.5 | USA           | Intrada/W189-163W                                                      |
| Vilela Sol            | 47.5 | Argentina     | Unknown pedigree                                                       |
| 111.92                | 58.8 | Argentina     | Unknown pedigree                                                       |
| Coop Capoido          | 79.3 | Argentina     | Unknown pedigree                                                       |
| Coop Millan           | 84.5 | Argentina     | Unknown pedigree                                                       |
| Livius                | 53.4 | Austria       | Karat/Lentia                                                           |
| Martin                | 42.6 | Austria       | Unknown pedigree                                                       |
| Toropi                | 51.3 | Brazil        | Petiblanco 8//Frontana1971-37//Quaderna A                              |
| Encruzilhada          | 44.1 | Brazil        | Fortaleza/ Kenya Farmer                                                |
| Klein Atlas           | 43.8 | CIMMYT        | Klein Lucero/Klein 157//Klein Rendidor                                 |
| Las Rosas Inta        | 80.6 | CIMMYT        | Unknown pedigree                                                       |
| Poncheau              | 77.6 | France        | Landrace                                                               |
| ABURA                 | 21.2 | Japan         | Landrace                                                               |
| SapporoHaruKomugiJugo | 21.7 | Japan         | Landrace                                                               |
| Aurora (ABPOPA)       | 85.2 | Russia        | Unknown pedigree                                                       |
| Suwon 92              | 36.7 | South Korea   | Landrace                                                               |
| Chokwang              | 58.4 | South Korea   | Landrace                                                               |
| Kharkof               | 64.7 | Ukraine       | Collected in: Kharkiv, Ukraine                                         |
| FK17                  | 16.2 | United Kindom | Unknown pedigree                                                       |

**Supplemental Table 4. Percentage of symptomatic spikelets of the accessions in G3**

| ACC.                   | PSS  | Origin      | Pedigree                                        |
|------------------------|------|-------------|-------------------------------------------------|
| Huangcandou            | 10.1 | China       | Landrace                                        |
| HuangFangZhu           | 11.2 | China       | Landrace                                        |
| QiangShuiHuang         | 12.2 | China       | Landrace                                        |
| MeiQianWu              | 12.6 | China       | Landrace                                        |
| LingHaiMaoYang Mo      | 13.5 | China       | Landrace                                        |
| WSB                    | 13.6 | China       | Landrace                                        |
| Hongjianzi             | 14.4 | China       | Landrace                                        |
| Caizihuang             | 14.5 | China       | Landrace                                        |
| HuiShanYangMai         | 14.7 | China       | Landrace                                        |
| Baisanyuehuang         | 14.8 | China       | Landrace                                        |
| ShuiLiZhan             | 16.9 | China       | Landrace                                        |
| Huochaobairimai        | 17.0 | China       | Landrace                                        |
| Haiyanzhong            | 17.9 | China       | Landrace                                        |
| Xueliqing              | 18.6 | China       | Landrace                                        |
| CanLaoMai              | 25.0 | China       | Landrace                                        |
| Dafanliuzhu            | 26.4 | China       | Landrace                                        |
| FSW                    | 26.9 | China       | Landrace                                        |
| ShanghaiCaiZiHuang     | 31.8 | China       | Landrace                                        |
| YangLaZi               | 32.5 | China       | Landrace                                        |
| WZHHS                  | 35.1 | China       | Landrace                                        |
| Sanyuehuang            | 48.0 | China       | Landrace                                        |
| LiangGuangTou          | 49.0 | China       | Landrace                                        |
| Y155                   | 50.0 | China       | Landrace                                        |
| Heshangmai             | 50.3 | China       | Landrace                                        |
| Dahongpao              | 55.1 | China       | Landrace                                        |
| HongMangMai            | 57.2 | China       | Landrace                                        |
| DaBaiPao               | 62.4 | China       | Landrace                                        |
| FangTouHongMang        | 62.5 | China       | Landrace                                        |
| DaHuangPi              | 62.6 | China       | Landrace                                        |
| YouBaoMai              | 67.0 | China       | Landrace                                        |
| SanYueHuang            | 69.9 | China       | Landrace                                        |
| FangTouBaiMang         | 70.0 | China       | Landrace                                        |
| PaiMaiTze              | 73.8 | China       | Landrace                                        |
| ChuShanBao             | 74.1 | China       | Landrace                                        |
| NTDHP                  | 77.3 | China       | Landrace                                        |
| HongMongBai            | 78.4 | China       | Landrace                                        |
| Chinese Spring         | 82.0 | China       | Landrace                                        |
| HongHuaWu              | 86.3 | China       | Landrace                                        |
| YouZiMai               | 87.7 | China       | Landrace                                        |
| Huochaomai             | 95.3 | China       | Landrace                                        |
| Anxuan2                | 67.9 | China       | Funo relative                                   |
| NyuBai                 | 6.6  | Japan       | Landrace                                        |
| NobeokaBozu            | 7.3  | Japan       | Landrace                                        |
| ASOZAIIRIII            | 9.0  | Japan       | JGB99-16, accession no. 23524, unknown pedigree |
| MINAMIKYUSHU 69        | 11.8 | Japan       | Landrace                                        |
| AsoZairai(YuubouKappu) | 12.9 | Japan       | Landrace                                        |
| TOKAI66                | 13.2 | Japan       | Landrace                                        |
| SHOUKOMUGI II          | 13.8 | Japan       | JGB99-61, accession no. 23653, unknown pedigree |
| NYUUBAI                | 15.5 | Japan       | JGB99-36, accession no. 22957, unknown pedigree |
| SOBAKOMUGI 1C          | 19.7 | Japan       | Landrace                                        |
| SOBAKOMUGI 1B          | 20.0 | Japan       | Landrace                                        |
| ASOTOMEA               | 20.6 | Japan       | Landrace                                        |
| KIKUCHI                | 21.4 | Japan       | JGB99-28, accession no. 23546, unknown pedigree |
| ITOUKOMUGI             | 21.7 | Japan       | JGB99-23, accession no. 23647, unknown pedigree |
| ABURAKOMUGI            | 22.6 | Japan       | Landrace                                        |
| KAGOSHIMA              | 26.4 | Japan       | Landrace                                        |
| SHIRONANKIN            | 27.5 | Japan       | JGB99-58, accession no. 23277, unknown pedigree |
| NobeokabozuKomugi      | 29.8 | Japan       | Landrace                                        |
| SOTOME                 | 33.1 | Japan       | Landrace                                        |
| Shinchunaga            | 45.3 | Japan       | selection from landrace Nakanaga                |
| ZAIRAIYUUBOU           | 47.6 | Japan       | Landrace                                        |
| Shirasaya No.1         | 53.1 | Japan       | Landrace                                        |
| Shanasui               | 64.3 | Japan       | Landrace                                        |
| CHILE                  | 69.8 | Japan       | Chili                                           |
| Sanshukomugi           | 76.2 | Japan       | Landrace                                        |
| Chukoku 81             | 37.3 | South Korea | Landrace                                        |

Supplemental Table 5. All the markers significant in single experiments

| Marker            | Chr.              | 2011           |                       | 2012           |                       | 2013           |                       |
|-------------------|-------------------|----------------|-----------------------|----------------|-----------------------|----------------|-----------------------|
|                   |                   | <i>p</i> value | <i>R</i> <sup>2</sup> | <i>p</i> value | <i>R</i> <sup>2</sup> | <i>p</i> value | <i>R</i> <sup>2</sup> |
| <i>Xwmc93</i>     | 1A                | 0.0432         | 0.0774                |                |                       |                |                       |
| <i>Xgwm11</i>     | 1B                | 0.0099         | 0.1177                |                |                       |                |                       |
| <i>Xbarc80</i>    | 1B                |                |                       | 0.0464         | 0.0989                |                |                       |
| <i>Xcfa2263</i>   | 2A                | 0.0311         | 0.1221                | 0.0038         | 0.158                 |                |                       |
| <i>Xgwm249</i>    | 2A                | <b>0.0265</b>  | <b>0.0679</b>         | <b>0.0237</b>  | <b>0.069</b>          |                |                       |
| <i>Xgwm95</i>     | 2A                | 0.0395         | 0.0947                |                |                       |                |                       |
| <i>Xgwm275</i>    | 2A                |                |                       | <b>0.0356</b>  | <b>0.0959</b>         | <b>0.024</b>   | <b>0.125</b>          |
| <i>Xwmc296</i>    | 2AS               | 0.0441         | 0.1079                |                |                       |                |                       |
| <i>Xgwm526</i>    | 2B                | 0.02           | 0.0624                |                |                       |                |                       |
| <i>Xwmc332</i>    | 2B                |                |                       | 0.0334         | 0.1423                |                |                       |
| <i>Xgwm261</i>    | 2D                | <b>0.0228</b>  | <b>0.1511</b>         | <b>0.0117</b>  | <b>0.1634</b>         | <b>0.0113</b>  | <b>0.163</b>          |
| <i>Xgwm320</i>    | 2D                | 0.0357         | 0.0722                |                |                       |                |                       |
| <i>Xgdm35</i>     | 2DS               |                |                       | 0.0073         | 0.1723                |                |                       |
| <i>Xbarc19</i>    | 3A                | 0.0227         | 0.07                  |                |                       |                |                       |
| <i>Xgwm533</i>    | 3B                | <b>0.003</b>   | <b>0.1077</b>         | <b>0.0452</b>  | <b>0.0682</b>         | <b>0.0104</b>  | <b>0.089</b>          |
| <i>Xbarc147</i>   | 3B                | 0.0012         | 0.1698                |                |                       | 0.0243         | 0.117                 |
| <i>Xsr2</i>       | 3B                | 0.0316         | 0.1369                |                |                       |                |                       |
| <i>Xbarc133</i>   | 3B                | <b>0.0218</b>  | <b>0.1047</b>         | <b>0.0491</b>  | <b>0.0903</b>         | <b>0.0086</b>  | <b>0.118</b>          |
| <i>Xgwm493</i>    | 3B                |                |                       | 0.0443         | 0.1292                |                |                       |
| <i>Xbarc77</i>    | 3B                |                |                       | 0.0437         | 0.1367                |                |                       |
| <i>Xgwm285</i>    | 3B                |                |                       | 0.0452         | 0.136                 |                |                       |
| <i>Xwmc274</i>    | 3B                |                |                       | 0.0483         | 0.0319                |                |                       |
| <i>Xwmc757</i>    | 4A                |                |                       |                |                       | 0.0114         | 0.163                 |
| <i>Xgwm160</i>    | 4AL               | <b>0.0323</b>  | <b>0.0902</b>         | <b>0.0001</b>  | <b>0.1718</b>         | <b>0.0067</b>  | <b>0.113</b>          |
| <i>Rht1,short</i> | 4B                |                |                       | 0.0305         | 0.0246                |                |                       |
| <i>Xssr3B</i>     | 4D                | 0.0216         | 0.0408                |                |                       |                |                       |
| <i>Xups4</i>      | 4D                | 0.0393         | 0.0869                |                |                       |                |                       |
| <i>Xwmc705</i>    | 5A                | 0.0116         | 0.1646                |                |                       |                |                       |
| <i>Xbarc56</i>    | 5A                |                |                       | 0.0172         | 0.0639                |                |                       |
| <i>Xgwm304</i>    | 5A                |                |                       | 0.025          | 0.1331                |                |                       |
| <i>Xbarc117</i>   | 5A                |                |                       | 0.0166         | 0.0644                |                |                       |
| <i>Xbarc186</i>   | 5A                |                |                       | 0.0019         | 0.1028                |                |                       |
| <i>Xgwm212</i>    | 5D                | 0.0128         | 0.0871                |                |                       |                |                       |
| <i>Xgwm88</i>     | 6B                |                |                       | 0.0008         | 0.1941                |                |                       |
| <i>Xwmc397</i>    | 6B                |                |                       | 0.0294         | 0.0911                |                |                       |
| <i>Xgwm469</i>    | 6D                | 0.0356         | 0.127                 |                |                       |                |                       |
| <i>Xgwm276</i>    | 7A                | <b>0.0163</b>  | <b>0.1578</b>         |                |                       | <b>0.0242</b>  | <b>0.125</b>          |
| <i>Xcfa2240</i>   | 7A                |                |                       | 0.0041         | 0.0926                |                |                       |
| <i>Xcfa2240.2</i> | 7A                |                |                       | 0.0053         | 0.0558                |                |                       |
| <i>Xgwm60</i>     | 7AS               | 0.0396         | 0.1099                |                |                       |                |                       |
| <i>Xwmc364</i>    | 7B                | 0.0307         | 0.1375                |                |                       |                |                       |
| <i>Xwmc273</i>    | 7A,7B,7D          | <b>0.0013</b>  | <b>0.1303</b>         | <b>0.0049</b>  | <b>0.1097</b>         | <b>0.0041</b>  | <b>0.112</b>          |
| <i>Xcfa2134</i>   | 3AL,3BL           |                |                       | 0.0227         | 0.1502                |                |                       |
| <i>Xbarc197</i>   | 3A,5A             | 0.045          | 0.1297                |                |                       |                |                       |
| <i>Xbarc173</i>   | 3B,6D             | 0.0415         | 0.086                 |                |                       |                |                       |
| <i>Xgdm138</i>    | 5B,5D             |                |                       |                |                       |                |                       |
| <i>Xbarc154</i>   | 7A,7D             |                |                       | 0.0049         | 0.0902                | 0.0186         | 0.089                 |
| <i>Xcfa2040</i>   | 1D,2D,7A,7B,7D    |                |                       | <b>0.0245</b>  | <b>0.1022</b>         | <b>0.0293</b>  | <b>0.098</b>          |
| <i>Xcfa2170</i>   | 1D,3A,3B          | 0.0304         | 0.107                 |                |                       |                |                       |
| <i>Xbarc169</i>   | 1D,6A,6B          |                |                       | 0.0466         | 0.0421                |                |                       |
| <i>Xwmc150</i>    | 2A,3A,5A,5D,6A,7D | 0.0374         | 0.0715                | 0.0072         | 0.0949                |                |                       |
| <i>Xbarc70</i>    | 4A,7A,7D          |                |                       | 0.0423         | 0.0693                |                |                       |
| <i>Xwmc47</i>     | 4B,5A,5B          | <b>0.009</b>   | <b>0.0922</b>         | <b>0.0155</b>  | <b>0.0839</b>         | <b>0.0194</b>  | <b>0.08</b>           |
| <i>Xwmc173</i>    | 1D,3A,4AS,5A      | 0.0126         | 0.0874                |                |                       |                |                       |
| <i>Xbarc10.2</i>  | 2B,4B,5A,7B       |                |                       | 0.0372         | 0.054                 |                |                       |
